# Supplementary material
Source: PubMed Central journal article supplement (PMC6765411)

Figure 1: Odds Ratios for using 1-year Depression to predict 2-year employment (1.767 (1.378, 2.265))

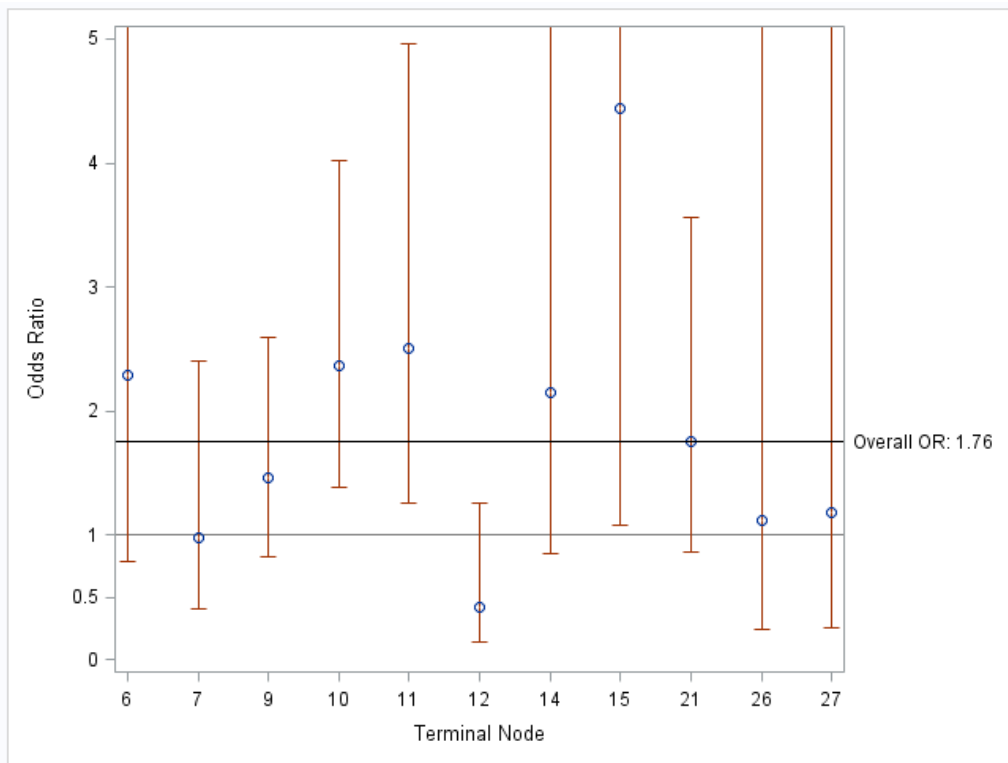

Figure 2: Odds Ratios for using 2-year Depression to predict 5-year employment (1.719 (1.364, 2.166))

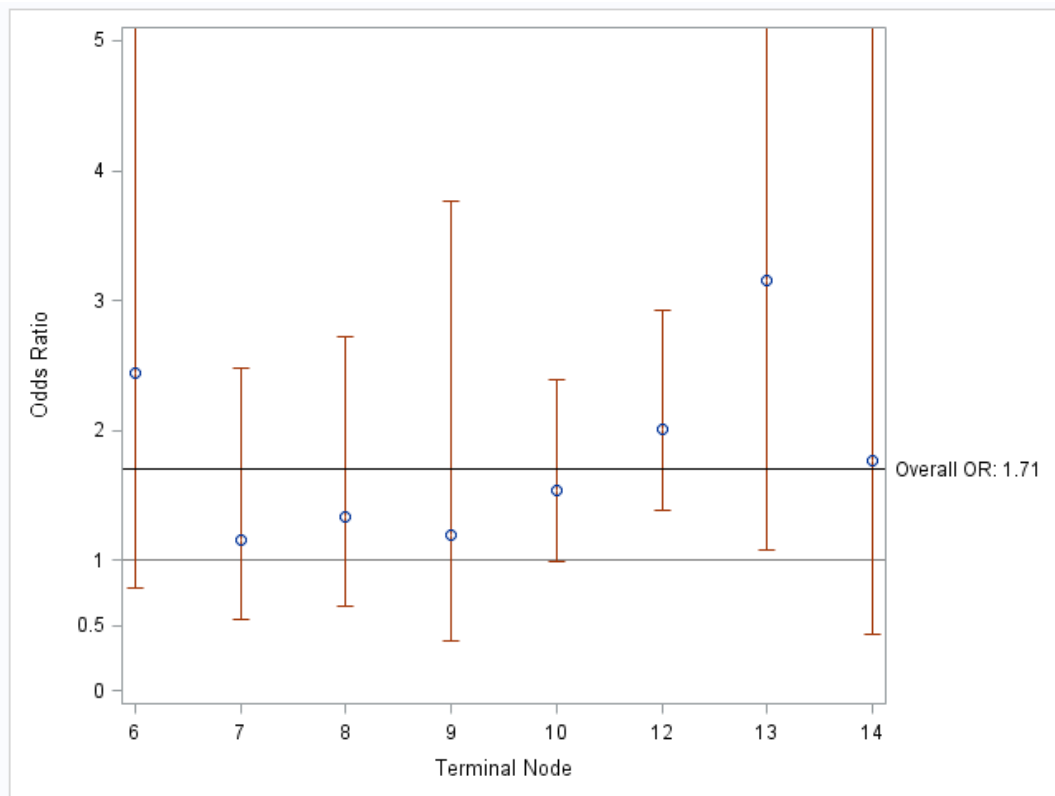

Figure 3: Odds Ratios for using 1-year Depression to predict 5-year employment (1.883 (1.481, 2.395))

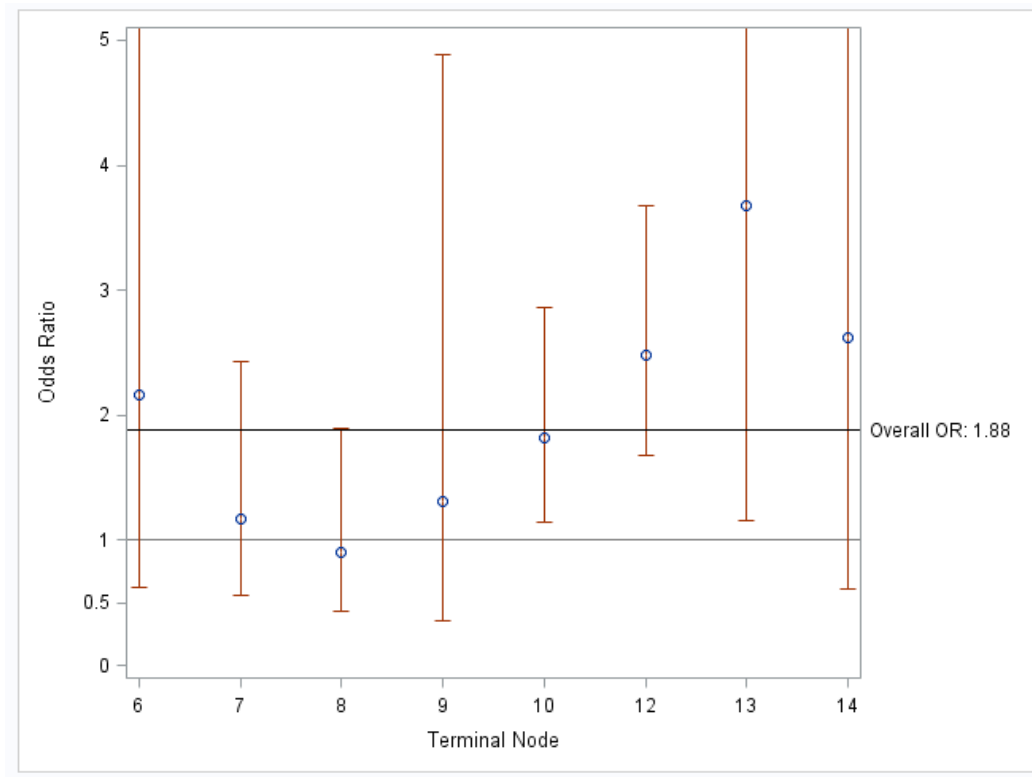

Supplement: NIHMS1535872-supplement-1.pdf [file NIHMS1535872-supplement-1.pdf]
